# Supplementary material for: Bacillus mycoides PM35 Reinforces Photosynthetic Efficiency, Antioxidant Defense, Expression of Stress-Responsive Genes, and Ameliorates the Effects of Salinity Stress in Maize
Source: MDPI journal article supplement (doi:10.3390/life12020219), 2022-01-30
Supplement: s1 [file s1]

### Supplementary T1. Experimental design for pot studies

| <u>Treatments</u> | <u>Description</u>                      |
|-------------------|-----------------------------------------|
| <u>T0</u>         | <u>Control</u>                          |
| <u>T1</u>         | <u>300 mM NaCl</u>                      |
| <u>T2</u>         | <u>600 mM NaCl</u>                      |
| <u>T3</u>         | <u>900 mM NaCl</u>                      |
| <u>T4</u>         | <u><i>Bacillus mycoides</i> PM35</u>    |
| <u>T5</u>         | <u><i>B. mycoides</i> PM35 + 300 mM</u> |
| <u>T6</u>         | <u><i>B. mycoides</i> PM35 + 600 mM</u> |
| <u>T7</u>         | <u><i>B. mycoides</i> PM35 + 900 mM</u> |

### Supplementary T2. Physio-chemical properties of soil

| <u>Soil parameters</u>                | <u>Soil 1 (Pre-sowing)</u> | <u>Soil 2 (Post-harvesting)</u> |
|---------------------------------------|----------------------------|---------------------------------|
| <u>Soil texture</u>                   | <u>Loamy</u>               | <u>Loamy</u>                    |
| <u>pH</u>                             | <u>7.94</u>                | <u>7.87</u>                     |
| <u>Electrical conductivity (dS/m)</u> | <u>1.53</u>                | <u>4.49</u>                     |
| <u>Organic matter (%)</u>             | <u>3.49</u>                | <u>1.88</u>                     |
| <u>Available Phosphorus (mg/kg)</u>   | <u>45.62</u>               | <u>33.85</u>                    |
| <u>Available Potassium (mg/kg)</u>    | <u>601</u>                 | <u>124</u>                      |
| <u>Saturation (%)</u>                 | <u>44</u>                  | <u>43</u>                       |
